# Supplementary material for: Efficient and well-controlled ring opening polymerization of biobased ethylene brassylate by α-diimine FeCl3 catalysts via a coordination–insertion mechanism
Source: Royal Society of Chemistry journal article supplement (doi:10.1039/d3dt02918b), 2023-01-01
Supplement: d3dt02918b1.pdf [file d3dt02918b1.pdf]

## Supporting Information

# Efficient and Well-Controlled Ring Opening Polymerization of Biobased Ethylene Brassylate by $\alpha$ -Diimine FeCl<sub>3</sub> Catalysts via a Coordination-Insertion Mechanism

Lijia Liu,<sup>a</sup> Chunyu Zhang,<sup>a</sup> Xuequan Zhang,<sup>a</sup> Heng Liu,<sup>\* a</sup> Feng Wang<sup>\* a</sup>

<sup>a</sup> Key Laboratory of Rubber-Plastics, Ministry of Education, Shandong Provincial Key Laboratory of Rubber-Plastics, Qingdao University of Science & Technology, Qingdao 266042, China;

Corresponding authors: hengliu@qust.edu.cn (H. Liu); fengwang@qust.edu.cn (F. Wang)

### Table of contents

|                                                                                                                                  |    |
|----------------------------------------------------------------------------------------------------------------------------------|----|
| <b>Table S1.</b> ROP of EB by L1-supported late-transition metal complexes.....                                                  | S2 |
| <b>Table S2.</b> ROP of EB by Fe <sup>III</sup> 1 under different [M]/[Fe] ratios.....                                           | S2 |
| <b>Table S3.</b> ROP of EB using Fe <sup>III</sup> 1 under different [PhCH <sub>2</sub> OH]/[Fe] ratios.....                     | S2 |
| <b>Table S4.</b> ROP of EB using Fe <sup>III</sup> 1 under different [Ph <sub>2</sub> CHOH]/[Fe] ratios.....                     | S3 |
| <b>Table S5.</b> Crystallographic data of complex Fe <sup>III</sup> 1.....                                                       | S3 |
| <b>Figure S1.</b> GPC profiles of PEBs obtained from Table S3-S4.....                                                            | S4 |
| <b>Figure S2.</b> <sup>1</sup> H NMR spectra (in CDCl <sub>3</sub> ) of PEB initiated by Ph <sub>2</sub> CHOH.....               | S4 |
| <b>Figure S3.</b> <sup>13</sup> C NMR spectra of poly(EB-co-CL) random copolymer.....                                            | S5 |
| <b>Figure S4.</b> GPC profiles of random PEB-co-PCL copolymer and PEB and PCL.....                                               | S5 |
| <b>Figure S5.</b> The 2D DOSY NMR spectrum (in CDCl <sub>3</sub> ) of PEB-co-PCL.....                                            | S5 |
| <b>Figure S6.</b> MALDI-TOF MS analysis of PEB obtained from Fe <sup>III</sup> 1/PhCH <sub>2</sub> OH/TMSCH <sub>2</sub> Li..... | S6 |
| <b>Experimental</b> .....                                                                                                        | S6 |
| <b>References</b> .....                                                                                                          | S9 |

**Table S1.** ROP of EB by **L1**-supported late-transition metal complexes.

| Entry <sup>a</sup> | Cat.                     | ROH                  | [EB]/[ROH]/<br>[Li]/[Cat.] | Yield<br>(%) | $M_n^b$ (10 <sup>4</sup><br>g/mol) | $M_w/M_n$ |
|--------------------|--------------------------|----------------------|----------------------------|--------------|------------------------------------|-----------|
| 1                  | <b>Fe<sup>III</sup>1</b> | Ph <sub>2</sub> CHOH | 100:3:3:1                  | 26.0         | 1.22                               | 1.70      |
| 2                  | <b>Fe<sup>III</sup>1</b> | Ph <sub>2</sub> CHOH | 100:3:3:1                  | 97.2         | 3.06                               | 1.52      |
| 3                  | <b>Co1</b>               | Ph <sub>2</sub> CHOH | 100:3:3:1                  | 54.4         | 1.63                               | 1.77      |
| 4                  | <b>Ni1</b>               | Ph <sub>2</sub> CHOH | 100:3:3:1                  | 87.4         | 1.67                               | 1.90      |
| 5                  | <b>Pd1</b>               | Ph <sub>2</sub> CHOH | 100:3:3:1                  | 32.1         | 1.07                               | 1.73      |

<sup>a</sup> Polymerization conditions: [EB] = 1.5 M, [Cat.] =  $9.2 \times 10^{-6}$  mol, in toluene, T = 110 °C, t = 30 min. <sup>b</sup> Determined via GPC against a polystyrene standard,  $M_w/M_n$  is polydispersity. Theoretical molecular weight of all polymers are  $0.9 \times 10^4$  g/mol.

**Table S2.** ROP of EB by **Fe<sup>III</sup>1** under different [M]/[Fe] ratios.

| Entry <sup>a</sup> | <b>Fe<sup>III</sup>1</b> ×<br>(10 <sup>-6</sup><br>mol) | [M]/[Ph <sub>2</sub> CHOH]<br>/[Li]/[Fe] | Yield<br>(%) | $M_n^b$<br>(10 <sup>4</sup><br>g/mol) | $M_w/M_n$ | Theoretical<br>$M_n$ (10 <sup>4</sup><br>g/mol) |
|--------------------|---------------------------------------------------------|------------------------------------------|--------------|---------------------------------------|-----------|-------------------------------------------------|
| 1                  | 9.2                                                     | 100:3:3:1                                | 97.2         | 3.06                                  | 1.52      | 0.90                                            |
| 2                  | 4.6                                                     | 200:3:3:1                                | 95.7         | 2.73                                  | 1.88      | 1.80                                            |
| 3                  | 3.1                                                     | 300:3:3:1                                | 95.8         | 3.97                                  | 1.90      | 2.70                                            |
| 4                  | 1.8                                                     | 500:3:3:1                                | 87.8         | 3.95                                  | 1.90      | 4.51                                            |
| 5                  | 0.9                                                     | 1000:3:3:1                               | 62.3         | 7.32                                  | 1.60      | 9.01                                            |

<sup>a</sup> Polymerization conditions: [EB] = 1.5 M, in toluene, T = 110 °C, t = 30 min. <sup>b</sup> Determined via GPC against a polystyrene standard,  $M_w/M_n$  is polydispersity.

**Table S3.** ROP of EB using **Fe<sup>III</sup>1** under different [PhCH<sub>2</sub>OH]/[Fe] ratios.

| Entry <sup>a</sup> | [M]/[PhCH <sub>2</sub> OH]<br>/[Li]/[Fe] | Yield<br>(%) | $M_n^b$ (10 <sup>4</sup><br>g/mol) | $M_w/M_n$ | Theoretical<br>$M_n$ (10 <sup>4</sup> g/mol) |
|--------------------|------------------------------------------|--------------|------------------------------------|-----------|----------------------------------------------|
| 1                  | 100:3:3:1                                | 97.6         | 1.78                               | 2.08      | 0.90                                         |
| 2                  | 100:5:3:1                                | 80.1         | 1.25                               | 1.86      | 0.54                                         |
| 3                  | 100:10:3:1                               | 88.4         | 0.57                               | 1.79      | 0.27                                         |
| 4                  | 100:15:3:1                               | 90.1         | 0.33                               | 1.71      | 0.18                                         |
| 5                  | 100:20:3:1                               | 85.8         | 0.29                               | 1.76      | 0.13                                         |
| 6                  | 100:25:3:1                               | 82.3         | 0.25                               | 1.50      | 0.10                                         |
| 7                  | 100:30:3:1                               | 82.4         | 0.21                               | 1.47      | 0.09                                         |

<sup>a</sup> Polymerization conditions: [EB] = 1.5 M, [Cat.] =  $9.2 \times 10^{-6}$  mol, in toluene, T = 110 °C, t = 30 min. <sup>b</sup> Determined via GPC against a polystyrene standard,  $M_w/M_n$  is polydispersity.

**Table S4.** ROP of EB using **Fe<sup>III</sup>1** under different [Ph<sub>2</sub>CHOH]/[Fe] ratios.

| Entry <sup>a</sup> | [M]/[Ph <sub>2</sub> CHOH]<br>/[Li]/[Fe] | Yield<br>(%) | <i>M<sub>n</sub></i> <sup>b</sup> (10 <sup>4</sup><br>g/mol) | <i>M<sub>w</sub></i> / <i>M<sub>n</sub></i> | Theoretical<br><i>M<sub>n</sub></i> (10 <sup>4</sup> g/mol) |
|--------------------|------------------------------------------|--------------|--------------------------------------------------------------|---------------------------------------------|-------------------------------------------------------------|
| 1                  | 100:3:3:1                                | 97.2         | 3.06                                                         | 1.52                                        | 0.90                                                        |
| 2                  | 100:5:3:1                                | 92.8         | 1.74                                                         | 1.68                                        | 0.54                                                        |
| 3                  | 100:10:3:1                               | 96.5         | 0.88                                                         | 1.65                                        | 0.27                                                        |
| 4                  | 100:15:3:1                               | 88.3         | 0.52                                                         | 1.73                                        | 0.18                                                        |
| 5                  | 100:20:3:1                               | 90.6         | 0.44                                                         | 1.61                                        | 0.13                                                        |
| 6                  | 100:25:3:1                               | 82.5         | 0.40                                                         | 1.58                                        | 0.10                                                        |
| 7                  | 100:30:3:1                               | 88.4         | 0.37                                                         | 1.56                                        | 0.09                                                        |

<sup>a</sup> Polymerization conditions: [EB] = 1.5 M, [Cat.] = 9.2 × 10<sup>-6</sup> mol, in toluene, T = 110 °C, t = 30 min. <sup>b</sup> Determined via GPC against a polystyrene standard, *M<sub>w</sub>*/*M<sub>n</sub>* is polydispersity.

**Table S5.** Crystallographic data of complex **Fe<sup>III</sup>1**.

|                                    | <b>Fe<sup>III</sup>1</b>                                         |
|------------------------------------|------------------------------------------------------------------|
| formula                            | C <sub>54</sub> H <sub>44</sub> Cl <sub>3</sub> FeN <sub>2</sub> |
| Fw/g mol <sup>-1</sup>             | 883.11                                                           |
| crystal System                     | Monoclinic                                                       |
| space group                        | P2 <sub>1</sub> /c                                               |
| <i>a</i> /Å                        | 9.0615(2)                                                        |
| <i>b</i> /Å                        | 18.6688(6)                                                       |
| <i>c</i> /Å                        | 28.0754(6)                                                       |
| <i>α</i> /°                        | 90                                                               |
| <i>β</i> /°                        | 92.536(2)                                                        |
| <i>γ</i> /°                        | 90                                                               |
| <i>V</i> /Å <sup>3</sup>           | 4744.8(2)                                                        |
| <i>Z</i>                           | 4                                                                |
| <i>T</i> /K                        | 300                                                              |
| ρ <sub>calc</sub> /cm <sup>3</sup> | 1.236                                                            |
| μ/mm <sup>-1</sup>                 | 4.379                                                            |
| F(000)                             | 1836.0                                                           |
| Crystal size/mm <sup>3</sup>       | 0.1 × 0.03 × 0.03                                                |
| 2θ range for data collection/°     | 5.686 to 153.042                                                 |
| Index ranges                       | -11 ≤ <i>h</i> ≤ 10, -23 ≤ <i>k</i> ≤ 19, -35 ≤ <i>l</i> ≤ 33    |
| Reflections collected              | 31028                                                            |
| Independent reflections            | 9435 [R <sub>int</sub> = 0.0639, R <sub>sigma</sub> = 0.0610]    |
| Data/restraints/parameters         | 9435/113/582                                                     |
| Goodness-of-fit on F <sup>2</sup>  | 1.108                                                            |

Final R indexes [ $I \geq 2\sigma(I)$ ]  
Final R indexes [all data]  
Largest diff. peak/hole /  $e \text{ \AA}^{-3}$

$R_1 = 0.0909$ ,  $wR_2 = 0.2760$   
 $R_1 = 0.1144$ ,  $wR_2 = 0.2994$   
1.38/-1.76

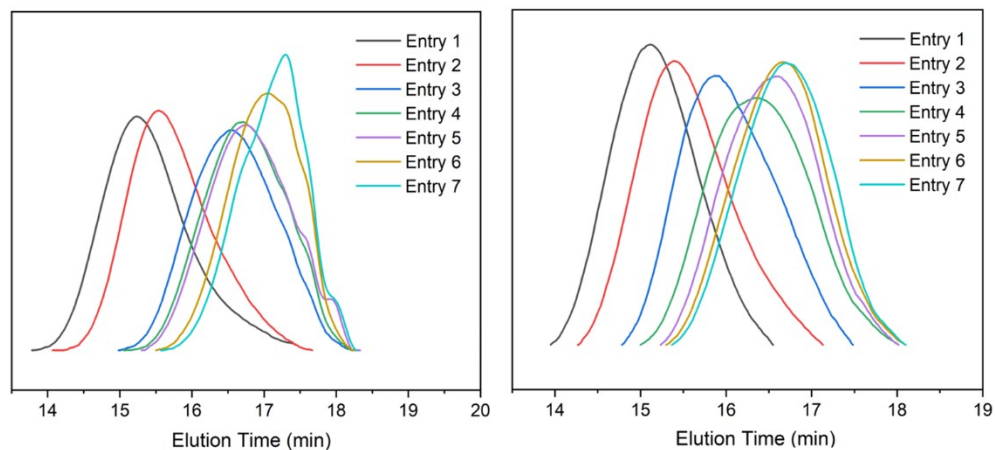

**Figure S1.** GPC profiles of PEBs obtained from Table S3 (left) and Table S4 (right).

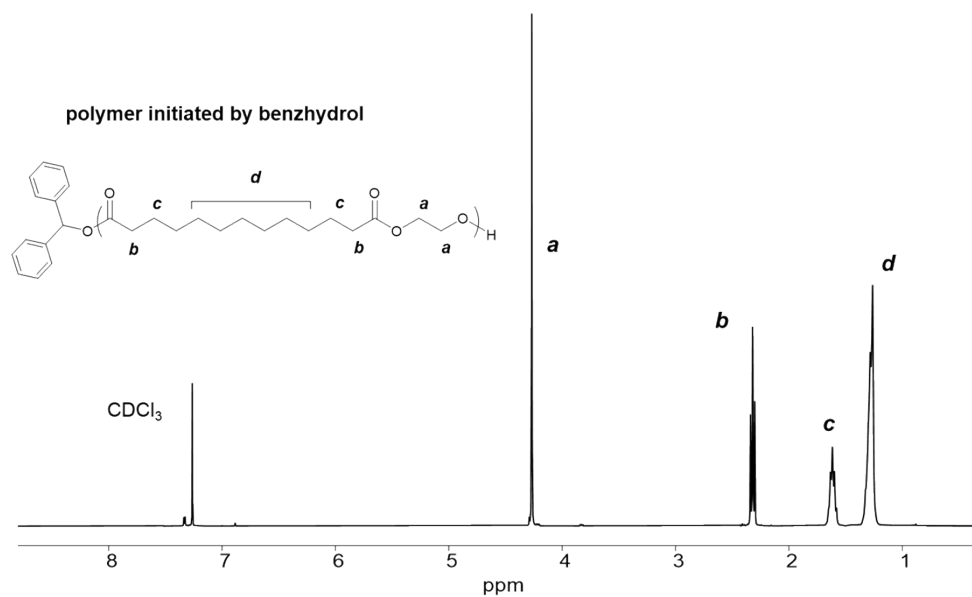

**Figure S2.**  $^1\text{H}$  NMR spectra (in  $\text{CDCl}_3$ ) of PEB initiated by  $\text{Ph}_2\text{CHOH}$  (Table 1, Run 2).

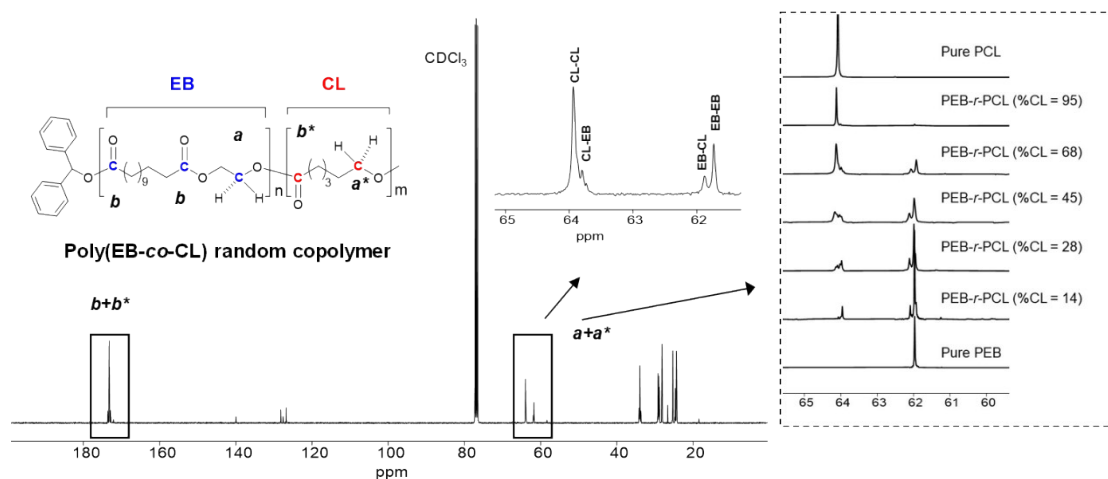

**Figure S3.**  $^{13}\text{C}$  NMR spectra of poly(EB-*co*-CL) random copolymer.

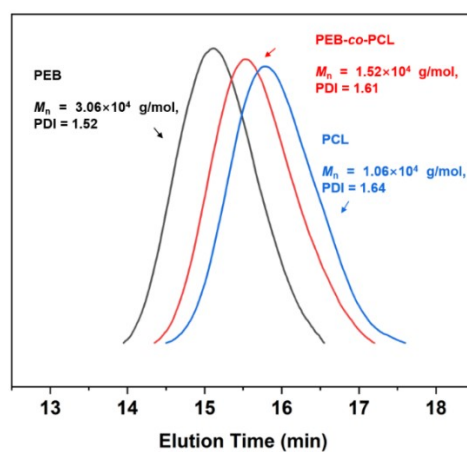

**Figure S4.** GPC profiles of random PEB-*co*-PCL copolymer and PEB and PCL (Table 2, Run 1, 5 and 8).

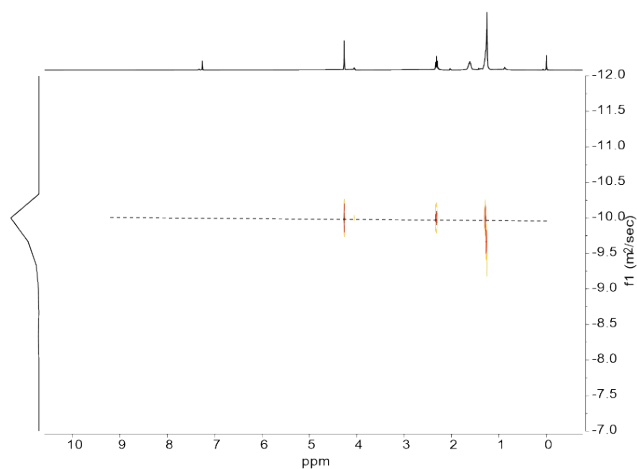

**Figure S5.** The 2D DOSY NMR spectrum (in  $\text{CDCl}_3$ ) of PEB-*co*-PCL (Table 2, Run 2)

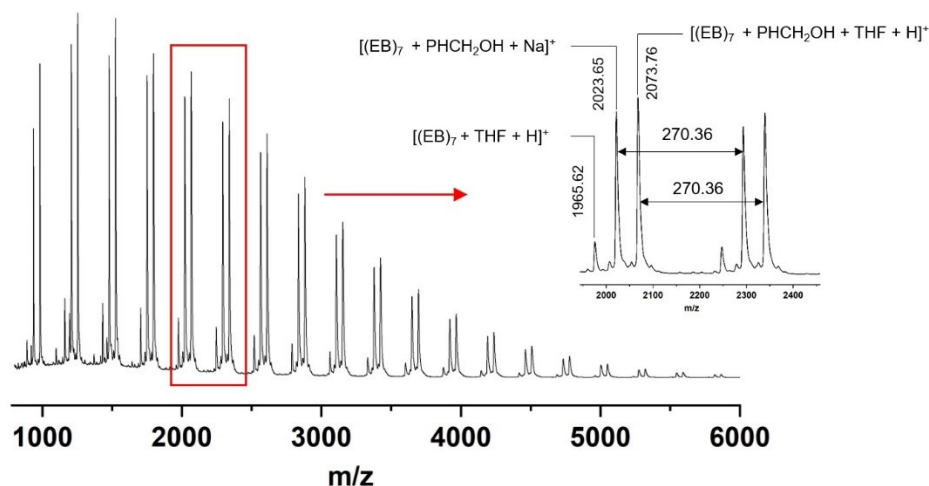

**Figure S6.** MALDI-TOF MS analysis of PEB obtained from  $\text{Fe}^{\text{III}}1/\text{PhCH}_2\text{OH}/\text{TMSCH}_2\text{Li}$  (table S3 entry 3)

## Experimental

### Materials and methods

All operations involving water-oxygen sensitive complexes are performed in the glove box in a dry nitrogen atmosphere. The solvents in the experiment, including toluene, dichloromethane, tetrahydrofuran and hexane were stirred on sodium filament and benzophenone or  $\text{CaH}_2$  for reflux distillation overnight at atmospheric pressure to use. Monomer, EB were dried on the  $\text{CaH}_2$  overnight and distilled under reduced pressure, with degassed by three freeze–pump–thaw cycles prior to use.  $\text{Ph}_3\text{COH}$  and  $\text{Ph}_2\text{CHOH}$  were dried under vacuum before use.  $\text{PhCH}_2\text{OH}$  was distilled under reduced pressure in the presence of  $\text{CaH}_2$ . (Trimethylsilyl)methyl lithium were synthesized in previous work. The FTIR spectra of complexes were determined by Fourier transform infrared spectrometer through KBr was pressed. The weight-average molecular weight ( $M_n$ ) and molecular weight distribution (PDI) values of the polymers were determined by GPC in THF according to PS standards. Differential scanning calorimetry (DSC) analyses of the polymeric samples were conducted under a nitrogen atmosphere by a PerkinElmer DSC 204F1 at a heating/cooling rate of  $10\text{ }^\circ\text{C min}^{-1}$ . Single crystals were obtained via recrystallization from saturated dichloromethane solutions. Single crystal grains obtained by solution diffusion were coated with liquid butadiene and placed on

a Rigaku HyPix X-ray single crystal diffractometer. CCD detector, Cu-K $\alpha$  ray as light source, wavelength 1.54184 Å. CCDC number for the ferric complex is 2246579.

### Synthesis of complexes Fe<sup>III</sup>1–Fe<sup>III</sup>8

**General procedure.** A typical procedure was shown in the following: into a flask was loaded a mixture of anhydrous FeCl<sub>3</sub> (0.25 mmol), ligand (0.25 mmol) and 20 mL of DCM, the resultant reaction mixture was stirred for 24 h at room temperature. Part of the solvent was removed under vacuum and the complex was precipitated by addition of hexane. The precipitate was collected by filtration and washed with hexane three times (3 × 10 mL) to afford a dark black solid.

**Complex Fe<sup>III</sup>1.** Yield: 64.9%. FT-IR (KBr, cm<sup>-1</sup>): 3059 (w), 3022 (w), 2918 (w), 1626 (w), 1585 (m), 1492 (m), 1446 (m), 1290 (w), 1032 (w), 859 (w), 833 (w), 775 (m), 741 (m), 701 (s), 629 (w), 534 (w). ESI-MS (m/z): calcd. for: C<sub>54</sub>H<sub>44</sub>Cl<sub>3</sub>FeN<sub>2</sub>: 881.19, found 721.35 [M – FeCl<sub>3</sub> + H]<sup>+</sup>. Anal. Calcd. for C<sub>54</sub>H<sub>44</sub>Cl<sub>3</sub>FeN<sub>2</sub>: C, 73.44; H, 5.02; N, 3.17. Found: C, 73.24; H, 5.16; N, 3.19.

**Complex Fe<sup>III</sup>2.** Yield: 67.4%. FT-IR (KBr, cm<sup>-1</sup>): 3058 (w), 3023 (w), 1732 (w), 1650 (w), 1602 (m), 1489 (s), 1447 (s), 1277 (w), 1072 (w), 1030 (m), 1032 (s), 909 (w), 827 (w), 768 (m), 746 (m), 700 (s), 605 (m), 558 (w). ESI-MS (m/z): calcd. for: C<sub>78</sub>H<sub>60</sub>Cl<sub>3</sub>FeN<sub>2</sub>: 1185.31, found 1025.48 [M – FeCl<sub>3</sub> + H]<sup>+</sup>. Anal. Calcd. for C<sub>78</sub>H<sub>60</sub>Cl<sub>3</sub>FeN<sub>2</sub>: C, 78.89; H, 5.09; N, 2.36. Found: C, 78.98; H, 5.23; N, 2.49.

**Complex Fe<sup>III</sup>3.** Yield: 91.3%. FT-IR (KBr, cm<sup>-1</sup>): 2999 (w), 2833 (w), 1606 (m), 1580 (m), 1511 (s), 1458 (m), 1303 (w), 1252 (s), 1177 (s), 1111 (w), 1032 (s), 833 (m), 777 (w), 581 (w). ESI-MS (m/z): calcd. for: C<sub>86</sub>H<sub>76</sub>Cl<sub>3</sub>FeN<sub>2</sub>O<sub>8</sub>: 1425.40, found 1265.55 [M – FeCl<sub>3</sub> + H]<sup>+</sup>. Anal. Calcd. for C<sub>86</sub>H<sub>76</sub>Cl<sub>3</sub>FeN<sub>2</sub>O<sub>8</sub>: C, 72.35; H, 5.37; N, 1.96. Found: C, 72.46; H, 5.27; N, 2.08.

**Complex Fe<sup>III</sup>4.** Yield: 83.4%. FT-IR (KBr, cm<sup>-1</sup>): 3059 (w), 3025 (w), 1657 (m), 1632 (m), 1601 (m), 1580 (m), 1493 (s), 1450(s), 1293 (w), 1219 (w), 1174 (w), 1077 (w), 1028 (w), 891 (w), 830 (w), 766 (m), 739 (m), 699 (s), 602 (m), 554 (w). ESI-MS (m/z): calcd. for: C<sub>78</sub>H<sub>52</sub>Cl<sub>3</sub>F<sub>8</sub>FeN<sub>2</sub>: 1329.24, found 1169.41 [M – FeCl<sub>3</sub> + H]<sup>+</sup>. Anal. Calcd. for C<sub>78</sub>H<sub>52</sub>Cl<sub>3</sub>F<sub>8</sub>FeN<sub>2</sub>: C, 70.36; H, 3.94; N, 2.10. Found: C, 70.49; H, 3.83; N, 2.18.

**Complex Fe<sup>III</sup>5.** Yield: 53.9%. FT-IR (KBr, cm<sup>-1</sup>): 3060 (w), 3027 (w), 2959 (m), 2866 (w), 1630 (m), 1596 (m), 1493 (m), 1446 (m), 1364 (w), 1184 (w), 1077 (w), 1029 (w), 761 (m), 735 (m), 699 (s), 605 (m) 475 (w). ESI-MS (m/z): calcd. for C<sub>84</sub>H<sub>72</sub>Cl<sub>3</sub>FeN<sub>2</sub>: 1269.41, found 1109.58 [M – FeCl<sub>3</sub> + H]<sup>+</sup>. Anal. Calcd. for C<sub>84</sub>H<sub>72</sub>Cl<sub>3</sub>FeN<sub>2</sub>: C, 79.34; H, 5.71; N, 2.20. Found: C, 79.43; H, 5.60; N, 2.11.

**Complex Fe<sup>III</sup>6.** Yield: 59.5%. FT-IR (KBr, cm<sup>-1</sup>): 3021 (w), 2959 (m), 2920 (w), 2866 (w), 1626 (m), 1585 (s), 1509 (s), 1447 (m), 1418 (w), 1361 (w), 1275 (w), 1187 (m), 1111 (m), 1018 (m), 816 (s), 772 (s), 725 (w), 665 (w), 575 (m), 484 (w). ESI-MS (m/z): calcd. for: C<sub>92</sub>H<sub>88</sub>Cl<sub>3</sub>FeN<sub>2</sub>: 1381.53, found 1221.70 [M – FeCl<sub>3</sub> + H]<sup>+</sup>. Anal. Calcd. for C<sub>92</sub>H<sub>88</sub>Cl<sub>3</sub>FeN<sub>2</sub>: C, 79.85; H, 6.41; N, 2.02. Found: C, 79.80; H, 6.33; N, 2.10.

**Complex Fe<sup>III</sup>7.** Yield: 77.2%. FT-IR (KBr, cm<sup>-1</sup>): 3059 (w), 3023 (w), 2835 (w), 1598 (s), 1494 (s), 1453 (s), 1302 (m), 1222 (w), 1193 (m), 1135 (m), 1051 (m), 955 (w), 857 (w), 827 (w), 767 (m), 740 (m), 699 (s), 600 (m), 575 (w), 530 (w). ESI-MS (m/z): calcd. for: C<sub>78</sub>H<sub>60</sub>Cl<sub>3</sub>FeN<sub>2</sub>O<sub>2</sub>: 1217.30, found 1057.47 [M – FeCl<sub>3</sub> + H]<sup>+</sup>. Anal. Calcd. for C<sub>78</sub>H<sub>60</sub>Cl<sub>3</sub>FeN<sub>2</sub>O<sub>2</sub>: C, 76.82; H, 4.96; N, 2.30. Found: C, 76.72; H, 5.08; N, 2.21.

**Complex Fe<sup>III</sup>8.** Yield: 71.4%. FT-IR (KBr, cm<sup>-1</sup>): 3020 (w), 2918 (w), 2863 (w), 1632 (m), 1884 (m), 1512 (s), 1426 (m), 1275 (w), 1216 (w), 1182 (m), 1110 (m), 1018 (m), 954 (w), 904 (m), 815 (s), 775 (s), 721 (m), 661 (w), 573 (m), 487 (m). ESI-MS (m/z): calcd. for: C<sub>84</sub>H<sub>70</sub>Cl<sub>5</sub>FeN<sub>2</sub>: 1340.59, found 1179.50 [M – FeCl<sub>3</sub> + H]<sup>+</sup>. Anal. Calcd. for C<sub>84</sub>H<sub>70</sub>Cl<sub>5</sub>FeN<sub>2</sub>: C, 75.26; H, 5.26; N, 2.09. Found: C, 75.35; H, 5.21; N, 2.18.

### Synthesis of complexes Fe<sup>II</sup>1, Co1, Ni1 and Pd1

**General procedure.** L1 ligand (0.25 mmol) were mixed with anhydrous FeCl<sub>2</sub> (0.25 mmol) and anhydrous NiCl<sub>2</sub> (0.25 mmol) in 20 mL of THF and DCM, respectively, the resultant reaction mixture was stirred for 48 h and 24 h at room temperature. Part of the solvent was removed under vacuum and the complex was precipitated by addition of hexane. The precipitate was collected by filtration and



washed with hexane three times ( $3 \times 10$  mL) to afford a dark solid. **Co1** and **Pd1** were synthesized according to the literature procedures.<sup>1,2</sup>

### Typical procedure for EB polymerization

In a typical homopolymerization, ROH, TMSCH<sub>2</sub>Li and required amount of toluene were added into the 20 ml vial in a ratio of 3:3, and the reaction system was shaken for a couple of minutes until the white precipitate appeared, indicating the formation of lithium alkoxide species. Afterwards, the ferrous precatalyst and EB monomer were to added sequentially, and the reaction system was left to be stirring for a given time at 110 °C. The reaction was quenched by excessive ethanol, and the resulting mixture was washed repeatedly with ethanol until white powder was obtained. Then the white powder was collected and dried under vacuum.

In a typical random copolymerization reaction, ROH, TMSCH<sub>2</sub>Li and required amount of toluene were added into the 20 ml vial in a ratio of 3:3, and the reaction system was shaken for a couple of minutes until the white precipitate appeared, indicating the formation of lithium alkoxide species. Afterwards, the ferrous precatalyst and EB/CL mixed monomer were to added sequentially, and the reaction system was left to be stirring for a given time at 110 °C. The reaction was quenched by excessive ethanol, and the resulting mixture was washed repeatedly with ethanol until white powder was obtained. Then the white powder was collected and dried under vacuum. The conversion of two components in a mixture was determined from <sup>13</sup>C NMR analysis in CDCl<sub>3</sub>.

### References

1. L. Liu, F. Wang, C. Zhang, H. Liu, G. Wu and X. Zhang, *Molecular Catalysis*, 2022, **517**, 112044.
2. J. S. Ouyang, Y. F. Li, D. S. Shen, Z. Ke and F. S. Liu, *Dalton Trans*, 2016, **45**, 14919-14927.
